# Supplementary material
Source: PubMed Central journal article supplement (PMC3426121)
Supplement: supp_tpc.112.100164_tpc100164Supplemental.pdf [file supp_tpc.112.100164_tpc100164Supplemental.pdf]

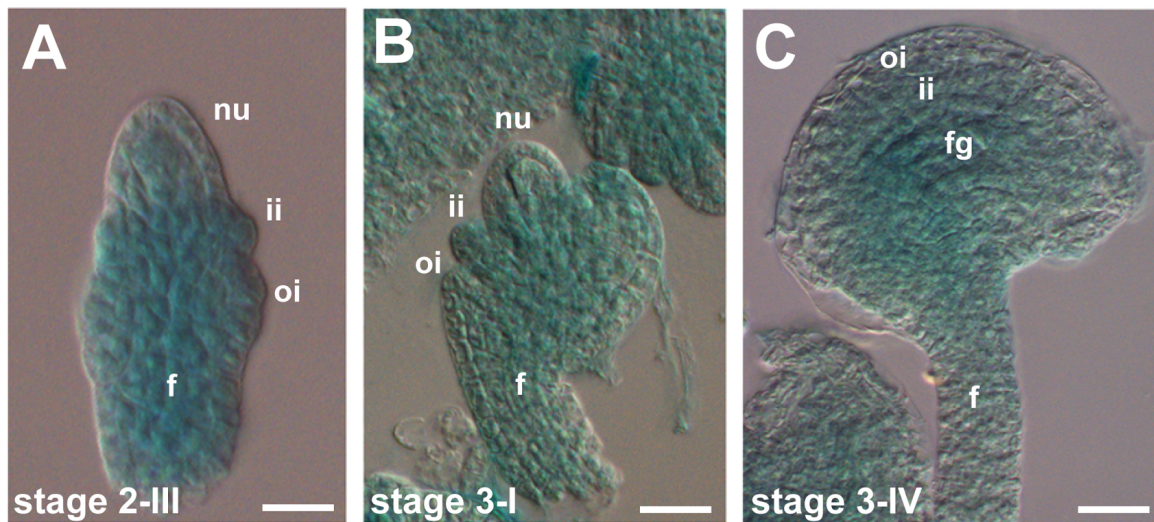

**Supplemental Figure 1. GUS Expression in *AHK3pro:GUS* Ovule from Stage 2-III to Stage 3-IV**

f, funiculus; fg, female gametophyte; ii, inner integument; oi, outer integument; nu, nucellus.

Bars = 20  $\mu$ m.

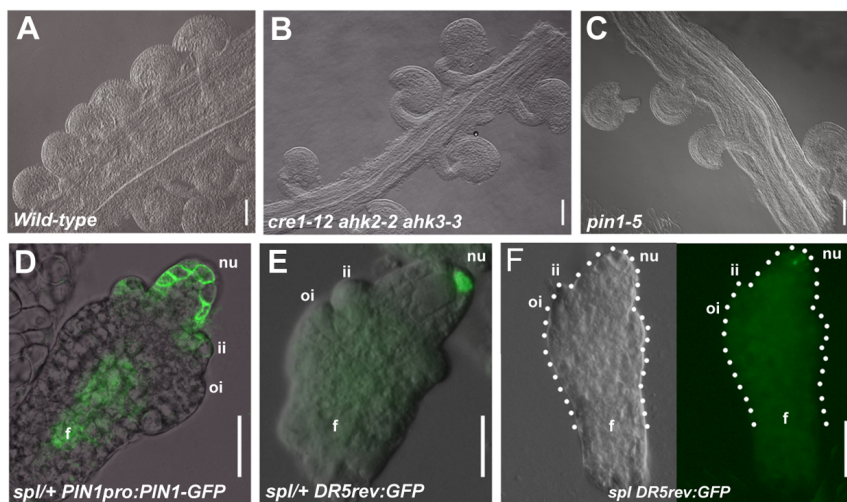

**Supplementary Figure 2.** The number of ovules is reduced in the *cre1-12 ahk2-2 ahk3-3* triple mutant (B) and in the *pin1-5* mutant (C) compared to wild-type (A). The *PIN1pro:PIN1-GFP* and the *DR5rev:GFP* are rightly expressed in *spl/+* background, whereas in *spl/spl* background the *DR5rev:GFP* is detectable in only few ovules (F). Bars in (A) to (C): 50 μm; in (D) to (F): 20 μm.

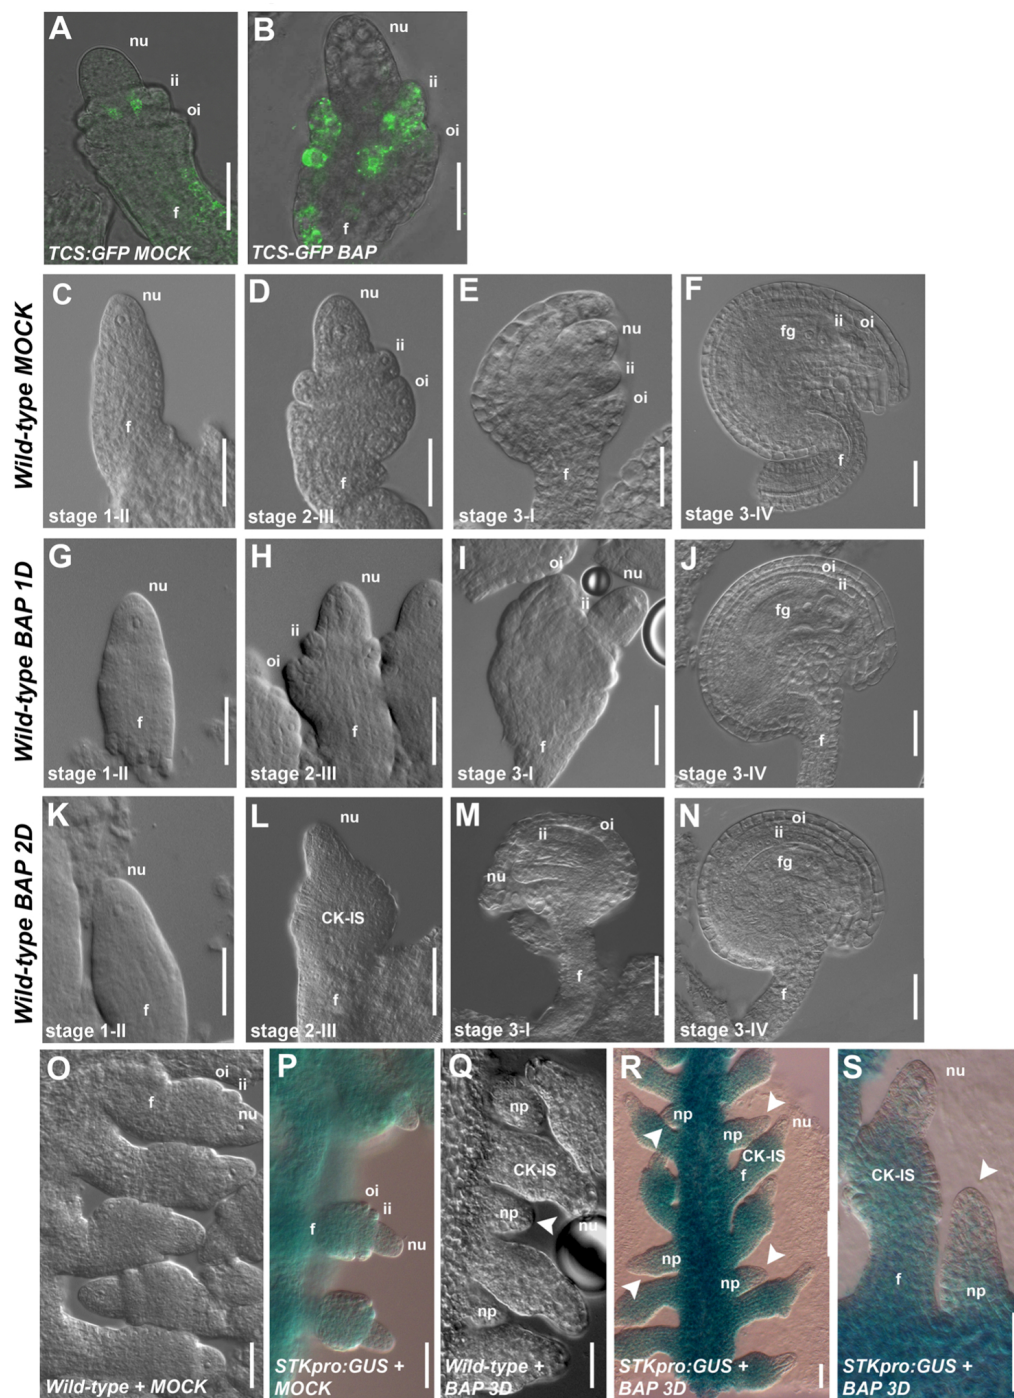

**Supplemental Figure 3. Ovule Development after BAP Treatment.**

(A) and (B) Signal of *TCSpro:GFP* in wild-type MOCK ovule (A) and Wild-type after two days of BAP treatment (B).

(C) to (F) Ovules from stage 1-II to 3-IV after treatment with MOCK.

(G) to (J) Ovules from stage 1-II to 3-IV after one day from the treatment with BAP.

(K) to (N) Ovules from stage 1-II to 3-IV after two days from the treatment with BAP.

(O) to (S) Application of BAP triggers to new ovule primordia outgrowth which maintain ovule identity as the correct expression of *STKpro:GUS* indicates.

f, funiculus; fg, female gametophyte; ii, inner integument; np, new primordia; nu, nucellus; oi, outer integument. Bars = 20  $\mu$ m

**Supplemental Table 1.** Ovule number in *cre1 ahk2 ahk3* and *pin1-5*

|                       | Carpel analysed | Number of ovules |
|-----------------------|-----------------|------------------|
| <i>wt</i>             | 10              | 480              |
| <i>cre1 ahk2 ahk3</i> | 10              | 53               |
| <i>pin1-5</i>         | 20              | 187              |

**Supplemental Table 2.** BAP effect on cytokinin receptor mutants

|                  | Observed 2-IV stage | Ovules with CK-IS | Percentage CK-IS |
|------------------|---------------------|-------------------|------------------|
| <i>wt</i>        | 612                 | 603               | 98.5%            |
| <i>cre</i>       | 550                 | 10                | 1.8%             |
| <i>ahk2</i>      | 470                 | 465               | 98%              |
| <i>ahk3</i>      | 500                 | 465               | 93%              |
| <i>ahk2\ahk3</i> | 456                 | 412               | 90%              |
